# Supplementary material for: Low LDL-C level and intracranial haemorrhage risk after ischaemic stroke: a prospective cohort study
Source: PubMed Central journal article supplement — Stroke Vasc Neurol. 2022 Sep 26;8(2):127–33. doi: 10.1136/svn-2022-001612 (PMC10176994; doi:10.1136/svn-2022-001612), 2022-09-26

**Supplemental figure 1. Study flowchart**

Abbreviations: CSCA, China Stroke Center Alliance; LDL-C, low density lipoprotein cholesterol;

BMI, body mass index.

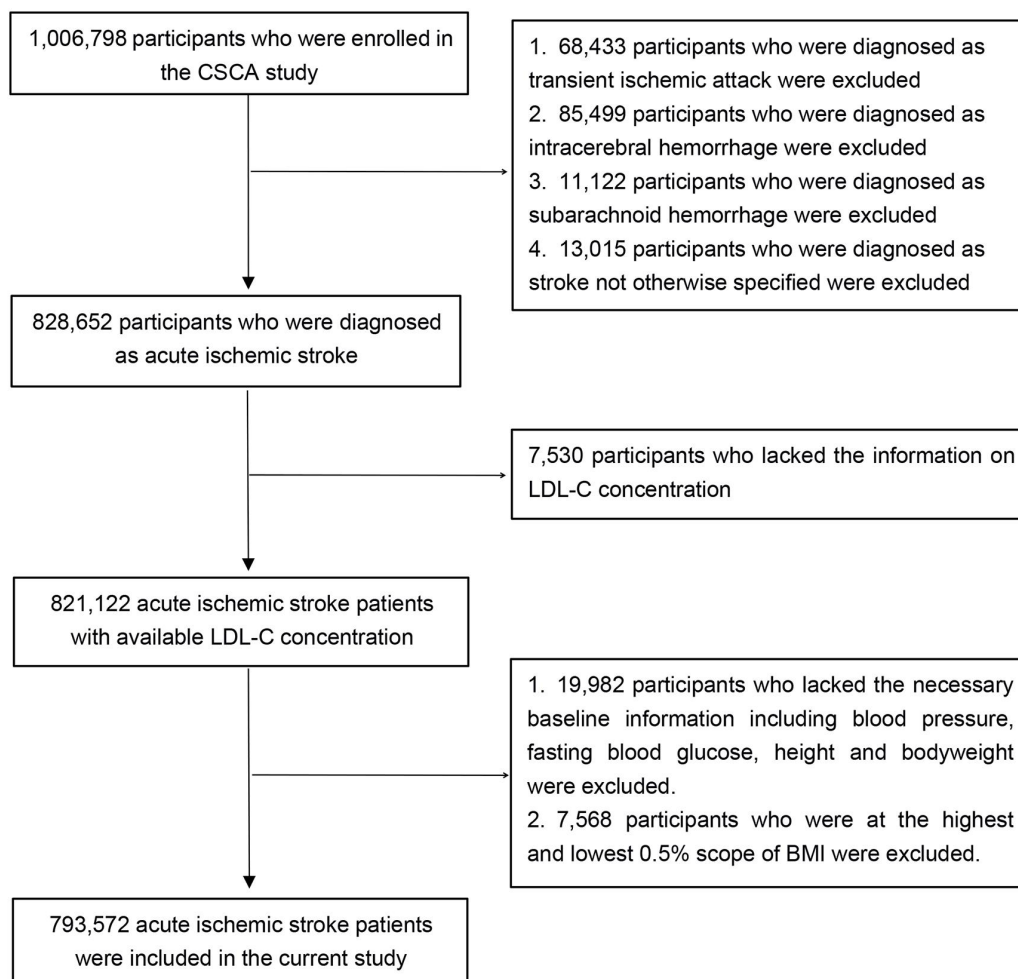

**Supplemental figure 2.** Event rates of hemorrhagic transformation, intracerebral hemorrhage and subarachnoid hemorrhage across per 0.5mmol/L of LDL-C

Abbreviations: LDL-C, low density lipoprotein cholesterol.

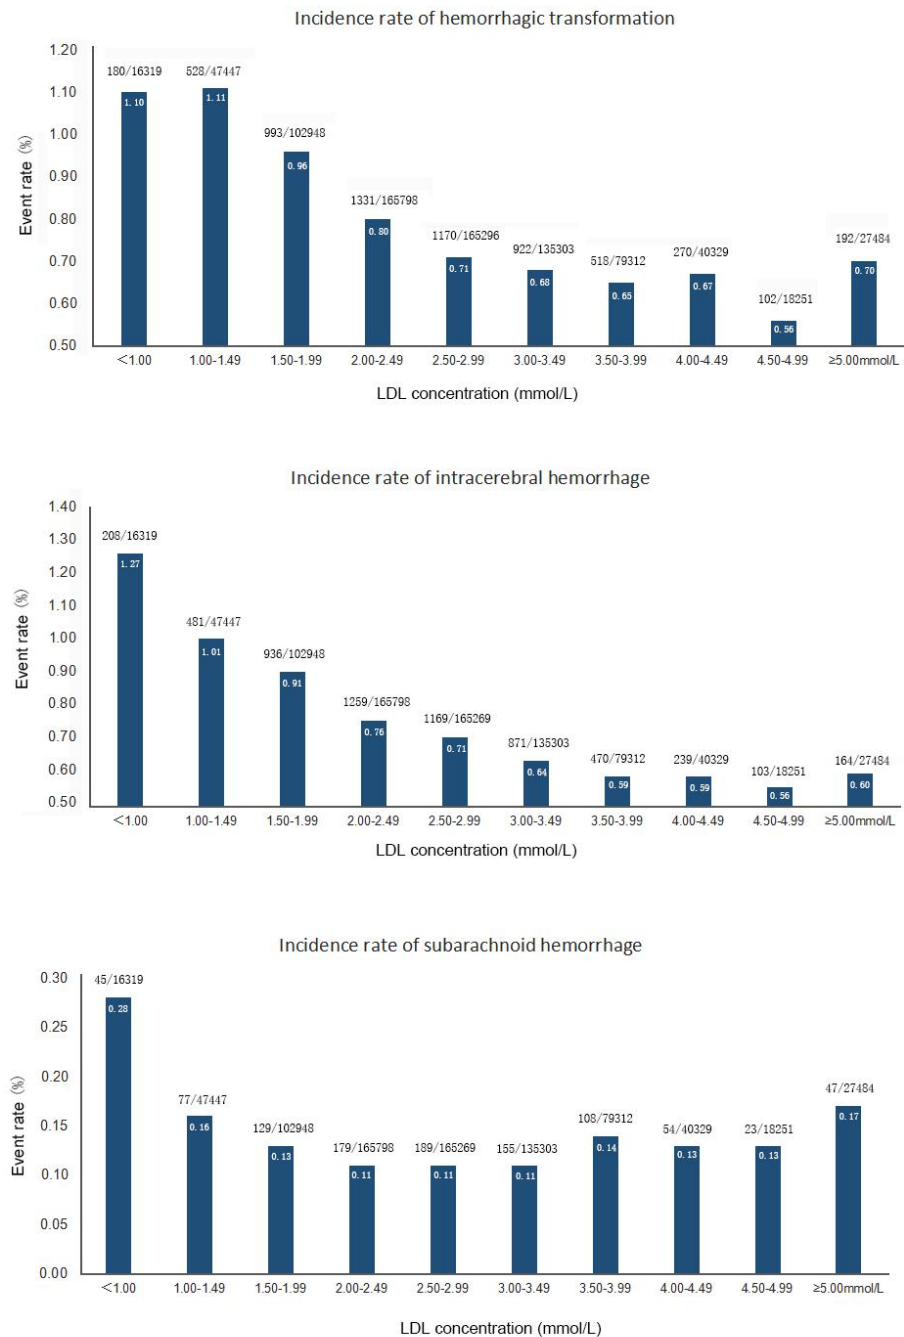

**Supplemental figure 3.** Odds ratios and 95% confidence intervals of hemorrhagic transformation, intracerebral hemorrhage and subarachnoid hemorrhage according to different LDL-C levels

Adjusted for age, sex, smoking, alcohol intake, NIHSS (0-4; 5-15; 16-20; 21-42; missing NIHSS); medical history (hypertension; diabetes mellitus); history of anticoagulation; dual antiplatelet therapy; SBP (per 20mmHg); fasting glucose; IV thrombolytic therapy; BMI, kg/m<sup>2</sup> (<18.5, 18.5-25, 25-30, ≥30).

Abbreviations: OR, Odds Ratio; CI, confidence interval; LDL-C, low density lipoprotein cholesterol.

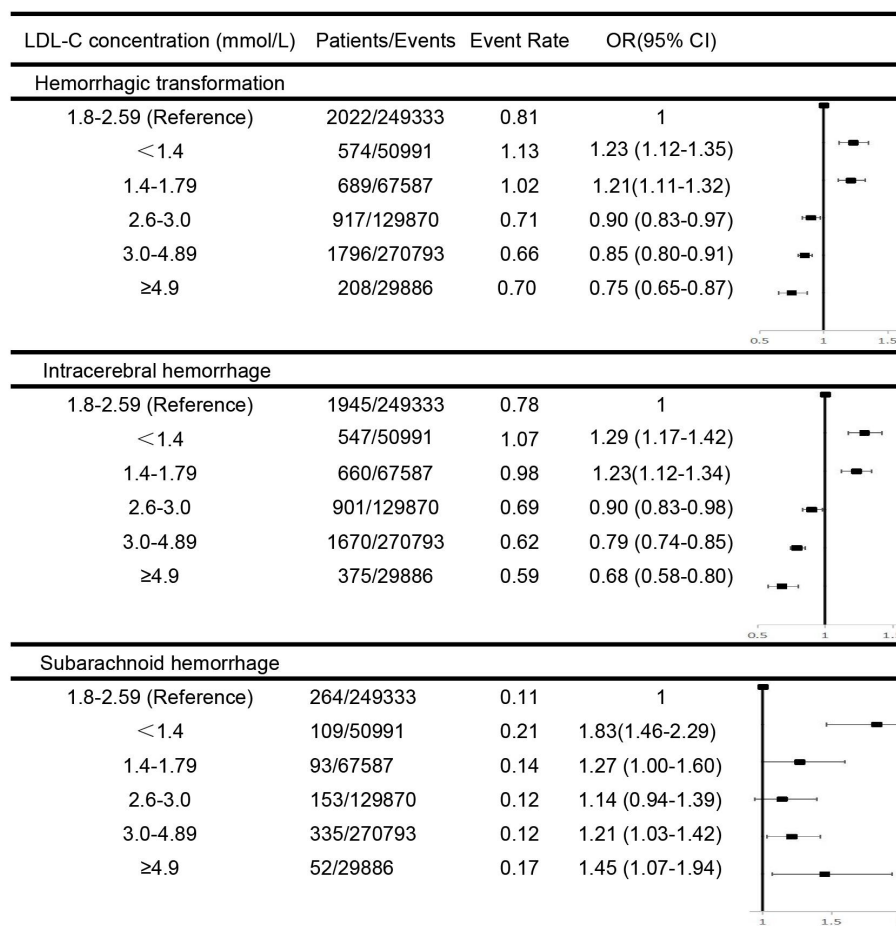

Supplement: svn-2022-001612supp001.pdf [file svn-2022-001612supp001.pdf]
