# Supplementary material for: Low LDL-C level and intracranial haemorrhage risk after ischaemic stroke: a prospective cohort study
Source: PubMed Central journal article supplement — Stroke Vasc Neurol. 2022 Sep 26;8(2):127–33. doi: 10.1136/svn-2022-001612 (PMC10176994; doi:10.1136/svn-2022-001612), 2022-09-26
Supplement: svn-2022-001612supp002.pdf [file svn-2022-001612supp002.pdf]

**Supplemental Table. Characteristics of the IS patients included and excluded from the whole population**

| Variable                           | Included IS patients | Excluded IS patients | <i>p</i> -value |
|------------------------------------|----------------------|----------------------|-----------------|
| N                                  | 798460               | 30192                | --              |
| Age, years                         | 66.14 (±11.98)       | 67.67 (±12.66)       | <0.01           |
| Women (%)                          | 298660 (37.40%)      | 11929 (39.51%)       | <0.01           |
| NIHSS                              | 3 (2,6)              | 4 (2,9)              | <0.01           |
| Current Smoking, n (%)             | 190202 (23.82%)      | 6716 (22.24%)        | <0.01           |
| Alcohol intake, %                  | 187274 (23.45%)      | 6448 (21.36%)        | <0.01           |
| Hypertension, %                    | 514971 (64.50%)      | 18735 (62.05%)       | <0.01           |
| Diabetes Mellitus, %               | 171838 (21.52%)      | 6085 (20.15%)        | <0.01           |
| Dislipidemia,%                     | 61813 (7.74%)        | 2159 (7.15%)         | <0.01           |
| Previous atrial fib/flutter, %     | 41997 (5.26%)        | 2396 (7.94%)         | <0.01           |
| Dual Antiplatelet Therapy          | 256106 (32.07%)      | 7967 (26.39%)        | <0.01           |
| IV thrombolytic therapy, %         | 48175 (6.03%)        | 2592 (8.59%)         | <0.01           |
| SBP, mmHg                          | 150.02 (±22.98)      | 149.66 (±25.68)      | <0.01           |
| Body mass index, kg/m <sup>2</sup> | 23.83 (±3.22)        | 23.97 (±4.39)        | <0.01           |
