# Supplementary material for: Low LDL-C level and intracranial haemorrhage risk after ischaemic stroke: a prospective cohort study
Source: HighWire-hosted journal article supplement (doi:10.1136/svn-2022-001612), 2022-09-26
Supplement: svn-2022-001612supp002_data_supplement.pdf [file svn-2022-001612supp002_data_supplement.pdf]

**Supplemental Table. Characteristics of the IS patients included and excluded from the whole population**

| Variable                           | Included IS patients  | Excluded IS patients  | <i>p</i> -value |
|------------------------------------|-----------------------|-----------------------|-----------------|
| N                                  | 798460                | 30192                 | --              |
| Age, years                         | 66.14 ( $\pm$ 11.98)  | 67.67 ( $\pm$ 12.66)  | <0.01           |
| Women (%)                          | 298660 (37.40%)       | 11929 (39.51%)        | <0.01           |
| NIHSS                              | 3 (2,6)               | 4 (2,9)               | <0.01           |
| Current Smoking, n (%)             | 190202 (23.82%)       | 6716 (22.24%)         | <0.01           |
| Alcohol intake, %                  | 187274 (23.45%)       | 6448 (21.36%)         | <0.01           |
| Hypertension, %                    | 514971 (64.50%)       | 18735 (62.05%)        | <0.01           |
| Diabetes Mellitus, %               | 171838 (21.52%)       | 6085 (20.15%)         | <0.01           |
| Dislipidemia,%                     | 61813 (7.74%)         | 2159 (7.15%)          | <0.01           |
| Previous atrial fib/flutter, %     | 41997 (5.26%)         | 2396 (7.94%)          | <0.01           |
| Dual Antiplatelet Therapy          | 256106 (32.07%)       | 7967 (26.39%)         | <0.01           |
| IV thrombolytic therapy, %         | 48175 (6.03%)         | 2592 (8.59%)          | <0.01           |
| SBP, mmHg                          | 150.02 ( $\pm$ 22.98) | 149.66 ( $\pm$ 25.68) | <0.01           |
| Body mass index, kg/m <sup>2</sup> | 23.83 ( $\pm$ 3.22)   | 23.97 ( $\pm$ 4.39)   | <0.01           |
